# Supplementary material for: National Prevalence of Disability and Disability Types Among Adults in the US, 2019
Source: PubMed Central journal article supplement (PMC8531993; doi:10.1001/jamanetworkopen.2021.30358), 2021-10-21
Supplement: jamanetwopen-e2130358-s001.pdf [file jamanetwopen-e2130358-s001.pdf]

## Supplemental Online Content

Varadaraj V, Deal JA, Campanile J, Reed NS, Swenor BK. National prevalence of disability and disability types among adults in the US, 2019. *JAMA Netw Open*. 2021;4(10):e2130358. doi:10.1001/jamanetworkopen.2021.30358

**eAppendix.** Six-Question Sequence on Disability (6QS) Questionnaire

This supplemental material has been provided by the authors to give readers additional information about their work.

## **eAppendix. Six-Question Sequence on Disability (6QS) Questionnaire**

1. Are you deaf, or do you have serious difficulty hearing?
2. Are you blind, or do you have serious difficulty seeing, even when wearing glasses?
3. Because of a physical, mental, or emotional condition, do you have serious difficulty concentrating, remembering, or making decisions?
4. Do you have serious difficulty walking or climbing stairs?
5. Do you have difficulty dressing or bathing?
6. Because of a physical, mental, or emotional condition, do you have difficulty doing errands alone such as visiting a doctor's office or shopping?

Response Options for each question are:

a.  Yes

b.  No
